# Supplementary material
Source: publisher site journal article supplement (https://www.dovepress.com/article/355922)
Supplement: Supplementary file 1 [file get_supplementary_file.php]

**Table S1. The results of the 2 × 2 (diagnosis × gender) ANOVA of the demographic and clinical data**

| Characteristic | CID (n=106) | | GSC (n=55) | | Main effect of Diagnosis | | | Main effect of Sex | | | Interactive effect of Diagnosis and Sex | | |
| --- | --- | --- | --- | --- | --- | --- | --- | --- | --- | --- | --- | --- | --- |
| Male(n=40) | Female (n=66) | Male(n=21) | Female (n=34) | *F/P* | *η2* | Power | *F/P* | *η2* | Power | *F/P* | *η2* | Power |
| Age | 35.92(10.44) | 36.11(12.06) | 34.10(8.78) | 36.79(9.82) | 0.22(0.638) | 0.001 | 0.075 | 0.88(0.349) | 0.006 | 0.154 | 0.26(0.607) | 0.002 | 0.081 |
| Education | 13.57(3.95) | 14.69(3.41) | 14.33(5.07) | 12.79(4.95) | 0.65(0.421) | 0.004 | 0.126 | 0.08(0.769) | 0.020 | 0.432 | 3.52(0.062) | 0.022 | 0.462 |
| SAS | 50.00(9.03) | 46.51(10.08) | 30.73(9.17) | 33.33(10.77) | 90.13(<0.001) | 0.417 | 1.000 | 0.07(0.794) | 0.006 | 0.154 | 3.24(0.074) | 0.037 | 0.687 |
| SDS | 50.80(11.24) | 48.36(10.01) | 30.58(6.31) | 33.07(7.61) | 112.13(<0.001) | 0.370 | 1.000 | 0.86(0.354) | 0.005 | 0.152 | 2.86(0.105) | 0.020 | 0.432 |

Abbreviations: CID, chronic insomnia disorder; GSC, good sleep controls; PSQI, Pittsburgh Sleep Quality Index; SDS, Zung self-rating depression scale; SAS, Zung self-rating anxiety scale.


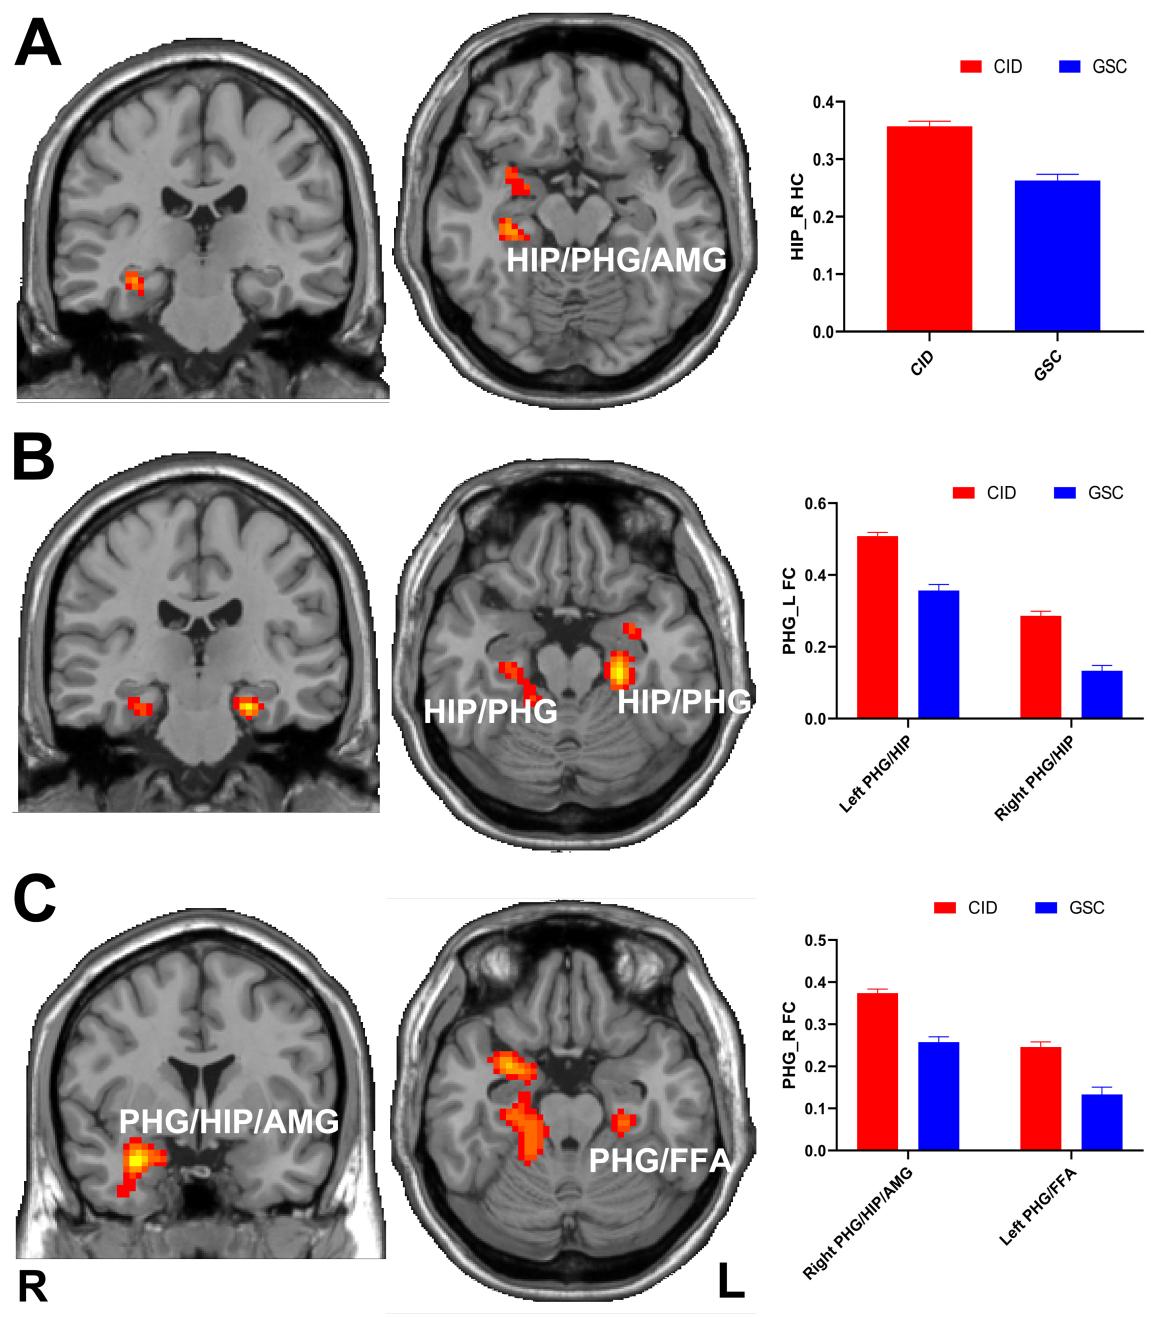


Figure S1. The main effect of diagnosis on the right HIP (A) / bilateral PHG (B,C) functional connectivity networks. Abbreviations: CID, chronic insomnia disorder; GSC, good sleep control; HIP, hippocampus; PHG, parahippocampal gyrus; FC, functional connectivity; AMG, amygdala; FFA, fusiform area.

**
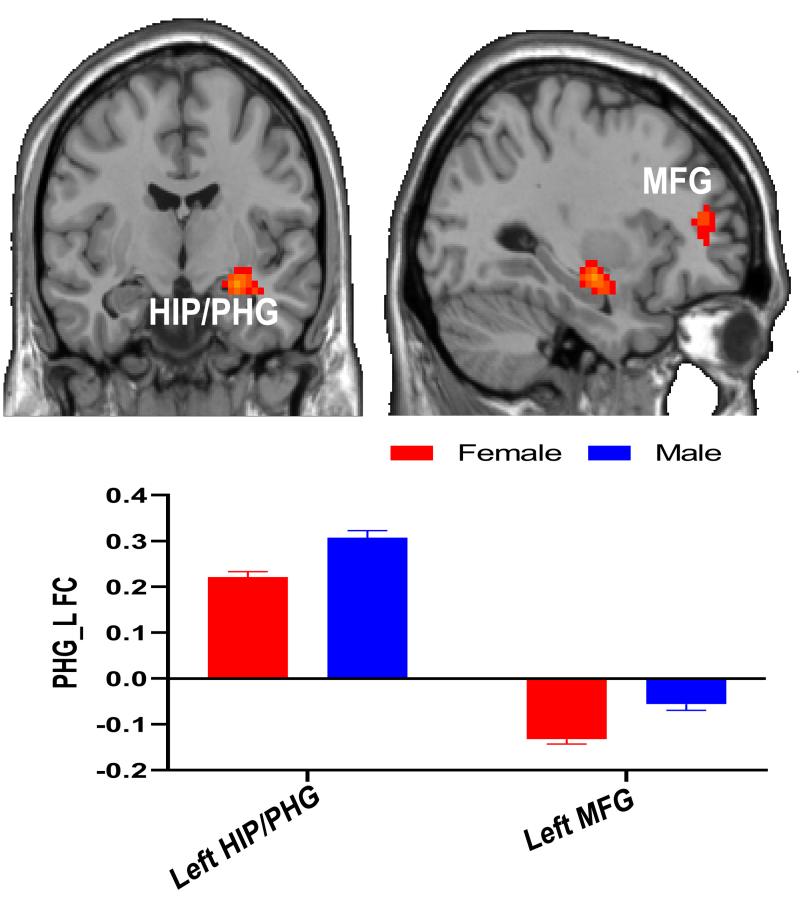
**

**Figure S2. The main effect of sex on the left parahippocampal gyrus functional network. Abbreviations:** HIP, hippocampus; PHG, parahippocampal gyrus; FC, functional connectivity; MFG, middle frontal gyrus.
